# Supplementary material
Source: MDPI journal article supplement (https://www.mdpi.com/2218-1989/11/3/174)
Supplement: s1 [file s1]

Archive with 2 entries (2 files):
- Figure S1-S2.pdf
- Table S1.pdf
