# Supplementary material for: HPTLC-Based Chemical Profiling: An Approach to Monitor Plant Metabolic Expansion Caused by Fungal Endophytes
Source: MDPI journal article supplement (doi:10.3390/metabo11030174), 2021-03-17
Supplement: s1 [file s1 › Table S1.pdf]

Table S1. Accesion numbers and supplementary isolated strain information.

| Accession number | Primer | Sense   | Identity                             | Isolation source                 | Organ          | Gene sequence                                                                                                                                                                                                                                                                                                                                                                                                                                                                                                                                                                                                                                                                                                                                                                                                                                                                                                                                                                                                                                                                                                                                                                                                                                                                                                                                                                                                                                                                                                                                                                                                                                                                                                                                                                                                                      |
|------------------|--------|---------|--------------------------------------|----------------------------------|----------------|------------------------------------------------------------------------------------------------------------------------------------------------------------------------------------------------------------------------------------------------------------------------------------------------------------------------------------------------------------------------------------------------------------------------------------------------------------------------------------------------------------------------------------------------------------------------------------------------------------------------------------------------------------------------------------------------------------------------------------------------------------------------------------------------------------------------------------------------------------------------------------------------------------------------------------------------------------------------------------------------------------------------------------------------------------------------------------------------------------------------------------------------------------------------------------------------------------------------------------------------------------------------------------------------------------------------------------------------------------------------------------------------------------------------------------------------------------------------------------------------------------------------------------------------------------------------------------------------------------------------------------------------------------------------------------------------------------------------------------------------------------------------------------------------------------------------------------|
| MW752807         | V9g    | Forward | <i>P. crustosum</i> <sup>a</sup>     | <i>A. scholaris</i> <sup>e</sup> | L <sup>s</sup> | 1 aaataaggag aaaaatattt ttggggtttg ggtttaaatt ttccccctc ctttacacac<br>61 cgcccgctgc tactaccgat tgaatggctc agtgaggcct tgggattggc ttaggagggt<br>121 tggcaacgac cccccagagc cgaaaacttg gtcaaactcg gtcatttaga ggaagtaaaa<br>181 gtcgtaacaa ggtttcgta ggtgaacctg cggaaggatc attaccgagt gagggccctc<br>241 tgggtccaac ctccccacc gtgtttattt tacctgttg ctcggcgagg ccgccttaa<br>301 ctggccgccc ggggggcttac gccccgggc ccgcgcccgc cgaagacacc ctgaactct<br>361 gctcgaagat tgaagtctga gtgaaaatat aaattattta aaactttcaa caacgatatc<br>421 cttggttccg gcatcgatga agaacgcagc gaaatgcgat acgtaatgtg aattgcaaat<br>481 tcagtgaatc atcagatctt tgaacgcaca ttgcgcccc tggatttccg gggggcatgc<br>541 ctgtccgagc gtcattgctg cctcaagcc cggcttggtg gttgggcccc gtccccgat<br>601 ctccggggga cgggcccga aggcagcggc ggcacgcgt ccgtctctg agcgtatggg<br>661 gctttgtcac ccgctctgta ggcccgccg gcgcttgccg atcaacccaa attttatcc<br>721 aggttgacct cgg<br>1 cgtaccgatt gatggctcag tgaggccttg ggattggctt tcggagggtt ggcaacgacc<br>61 cccagtagc cgaaaacttt ggtcaaaact ggtcatttag aggaagtaaa agtcgtaaca<br>121 aggtttccgt aggtgaacct gcggaaggat cattaccgag tgagggccct ctgggtccaa<br>181 cctccacc ccgtttattt tacctgttg ctcggcgagg ccgccttaa ctggccgccc<br>241 ggggggcttac gccccgggc ccgcgcccgc cgaagacacc ctgaactct gctcgaagat<br>301 tgaagtctga gtgaaaatat aaattattta aaactttcaa caacgatatc cttggttccg<br>361 gcatcgatga agaacgcagc gaaatgcgat acgtaatgtg aattgcaaat tcagtgaatc<br>421 atcagatctt tgaacgcaca ttgcgcccc tggatttccg gggggcatgc ctgtccgagc<br>481 gtcattgctg cctcaagcc cggcttggtg gttgggcccc cgtccccga tctccggggg<br>541 acgggcccga aaggcagcgg cgcacgcg tccggtctc gagcgtatgg ggctttgtca<br>601 ccgctctgt aggcccgcc ggctgtgccc gatcaacca aattttatc caggttgacc<br>661 tcggatcagg tagggatacc cgtgaactt aagctaccta aaaaaagaa aagaagata<br>721 aaaaaagata aaaagggggt t |
| MW752808         | ITS4   | Reverse | <i>P. crustosum</i>                  | <i>A. scholaris</i>              | L              | 1 cttggtcatt tagaggaagt aaaagtcgta acaaggtttc ctaggtgaa cctgcggaag<br>61 gatcattact gattgcccgt cctcgtgga ccgaacctcc caccctgtc tctgtatac<br>121 cctgttgctt tggcggggccc actgggaate ccagtcgcc gaggggcact gtgcccttg<br>181 gcccgtgccc gccagagcgc cttgaacc taatgaagat ggactgtctg agcatgattg<br>241 ataataatca aaactttcaa caatggatct cttggttccg gcatcgatga agaacgcagc<br>301 gaaatgcgat aagtaatgtg aattgcagaa ttccgtgaat catcgaatct ttgaacgcac<br>361 attgcgccc ctggcattcc ggggggcatg cctgtccgag cgtatttct gccctcaagc<br>421 acggcttggtg tttgggggtg tggccccct ggggacctgc ctgaaaggca gtggcgacgc<br>481 ccgcctaggt cctcagcgt atggggcttt gtcaccgct cgggaaggat ctacgggcgt<br>541 tg<br>1 cttggtcatt tagaggaagt aaaagtcgta acaaggtttc ctaggtgaa cctgcggaag<br>61 gatcattact gattgcccgt cctcgtgga ccgaacctcc caccctgtc tctgtatac<br>121 cctgttgctt tggcggggccc actgggaate ccagtcgcc gaggggcact gtgcccttg<br>181 gcccgtgccc gccagagcgc cttgaacc taatgaagat ggactgtctg agcatgattg                                                                                                                                                                                                                                                                                                                                                                                                                                                                                                                                                                                                                                                                                                                                                                                                                                                                |
| MW855891         | V9g    | Forward | <i>Penicillium</i> spp. <sup>b</sup> | <i>A. scholaris</i>              | L              | 1 cttggtcatt tagaggaagt aaaagtcgta acaaggtttc ctaggtgaa cctgcggaag<br>61 gatcattact gattgcccgt cctcgtgga ccgaacctcc caccctgtc tctgtatac<br>121 cctgttgctt tggcggggccc actgggaate ccagtcgcc gaggggcact gtgcccttg<br>181 gcccgtgccc gccagagcgc cttgaacc taatgaagat ggactgtctg agcatgattg<br>241 ataataatca aaactttcaa caatggatct cttggttccg gcatcgatga agaacgcagc<br>301 gaaatgcgat aagtaatgtg aattgcagaa ttccgtgaat catcgaatct ttgaacgcac<br>361 attgcgccc ctggcattcc ggggggcatg cctgtccgag cgtatttct gccctcaagc<br>421 acggcttggtg tttgggggtg tggccccct ggggacctgc ctgaaaggca gtggcgacgc<br>481 ccgcctaggt cctcagcgt atggggcttt gtcaccgct cgggaaggat ctacgggcgt<br>541 tg                                                                                                                                                                                                                                                                                                                                                                                                                                                                                                                                                                                                                                                                                                                                                                                                                                                                                                                                                                                                                                                                                                                                                          |
| MW855892         | ITS4   | Reverse | <i>Penicillium</i> spp.              | <i>A. scholaris</i>              | L              | 1 cttggtcatt tagaggaagt aaaagtcgta acaaggtttc ctaggtgaa cctgcggaag<br>61 gatcattact gattgcccgt cctcgtgga ccgaacctcc caccctgtc tctgtatac<br>121 cctgttgctt tggcggggccc actgggaate ccagtcgcc gaggggcact gtgcccttg<br>181 gcccgtgccc gccagagcgc cttgaacc taatgaagat ggactgtctg agcatgattg                                                                                                                                                                                                                                                                                                                                                                                                                                                                                                                                                                                                                                                                                                                                                                                                                                                                                                                                                                                                                                                                                                                                                                                                                                                                                                                                                                                                                                                                                                                                             |

|          |      |         |                                      |                                   |    |                                                                                                                                                                                                                                                                                                                                                                                                                                                                                                                                                                                                                                                                                                                                                                                                                                                                                                                                                                                                                                                                                                                                                                                                                                                                                                                                                                                                                                                                                                                                                                                                                                                                                                                                                                                                                                                                                                                                                                                                                                                                                                                                                                                                                                                                                                                                                                                                                                                                                                                                                                                                                                                                                                                                                                                                                                                                                                                                                                                                                             |
|----------|------|---------|--------------------------------------|-----------------------------------|----|-----------------------------------------------------------------------------------------------------------------------------------------------------------------------------------------------------------------------------------------------------------------------------------------------------------------------------------------------------------------------------------------------------------------------------------------------------------------------------------------------------------------------------------------------------------------------------------------------------------------------------------------------------------------------------------------------------------------------------------------------------------------------------------------------------------------------------------------------------------------------------------------------------------------------------------------------------------------------------------------------------------------------------------------------------------------------------------------------------------------------------------------------------------------------------------------------------------------------------------------------------------------------------------------------------------------------------------------------------------------------------------------------------------------------------------------------------------------------------------------------------------------------------------------------------------------------------------------------------------------------------------------------------------------------------------------------------------------------------------------------------------------------------------------------------------------------------------------------------------------------------------------------------------------------------------------------------------------------------------------------------------------------------------------------------------------------------------------------------------------------------------------------------------------------------------------------------------------------------------------------------------------------------------------------------------------------------------------------------------------------------------------------------------------------------------------------------------------------------------------------------------------------------------------------------------------------------------------------------------------------------------------------------------------------------------------------------------------------------------------------------------------------------------------------------------------------------------------------------------------------------------------------------------------------------------------------------------------------------------------------------------------------------|
|          |      |         |                                      |                                   |    | 241 ataataatca aaactttcaa caatggatct ctgtgtccg gcatcgatga agaacgcagc<br>301 gaaatgcgat aagtaatgtg aattgcagaa ttccgtgaat catcgaatct ttgaacgcac<br>361 attgcgcccc ctggcattcc ggggggcatg cctgtccgag cgtcatttct gccctcaagc<br>421 acggcttgtg tgttgggggtg tgggtcccct ggggacctgc ctgaaaggca gtggcgacgc<br>481 ccgcctaggt cctcgagcgt atggggcttt gtcaccgcgt cgggaaggat ctacgggcgt<br>541 tggcttcca tattttttc cacggttgac ctggatcag gtaggagtta cccgctgaac<br>601 tt<br>1 cttggtcatt tagaggaagt aaaagtcgta acaaggtttc ctaggtgaa cctgcggaag<br>61 gatcattact gaggccggt cctcgcgga ccgaacctcc caccctgtc tctgtatac<br>121 cctgttctt tggcgggccc actgggaatc ccagtcgcc gaggggcact gtgccctgg<br>181 gccgtgccc gccagagcgc cctgaacct taatgaagat ggactgtctg agcatttttg<br>241 ataataatca aaactttcaa caatggatct ctgtgtccg gcatcgatga agaacgcagc<br>301 gaaatgcgat aagtaatgtg aattgcagaa ttccgtgaat catcgaatct ttgaacgcac<br>361 attgcgcccc ctggcattcc ggggggcatg cctgtccgag cgtcatttct gccctcaagc<br>421 acggcttgtg tgttgggggtg tgggtcccct ggggacctac ctgaaaggca gtggcgacgc<br>481 ccgcctaggt cctcgagcgt atggggcttt gtcaccgcgt cgggaaggat ctacgggtgt<br>541 t<br>1 cttggtcatt tagaggaagt aaaagtcgta acaaggtttc ctaggtgaa cctgcggaag<br>61 gatcattact gaggccggt cctcgcgga ccgaacctcc caccctgtc tctgtatac<br>121 cctgttctt tggcgggccc actgggaatc ccagtcgcc gaggggcact gtgccctgg<br>181 gccgtgccc gccagagcgc cctgaacct taatgaagat ggactgtctg agcatttttg<br>241 ataataatca aaactttcaa caatggatct ctgtgtccg gcatcgatga agaacgcagc<br>301 gaaatgcgat aagtaatgtg aattgcagaa ttccgtgaat catcgaatct ttgaacgcac<br>361 attgcgcccc ctggcattcc ggggggcatg cctgtccgag cgtcatttct gccctcaagc<br>421 acggcttgtg tgttgggggtg tgggtcccct ggggacctac ctgaaaggca gtggcgacgc<br>481 ccgcctaggt cctcgagcgt atggggcttt gtcaccgcgt cgggaaggat ctacgggtgt<br>541 tggcttcca tattttttc cacggttgac ctggatcag gtaggagtta cccgctgaac<br>601 ttaagc<br>1 gccgtcgtct actaccgatt gaatggctca gtgaggcttt cggactggcc cagagagggtg<br>61 ggcaactacc actcagggcc gaaagtta ccaactcgg tcatttagag gaagtaaaag<br>121 tcgtaacaag gtctccgttg gtgaaccagc ggagggatca ttaactagtt accgctctac<br>181 aaccctttgt gaacatacct aaccgttgtt tcggcgggca ggggaagcct ctctgtggcg<br>241 gacctcccg gcgcggccc cgtcacgggg gcggagcgcc cgccggagga aaccaactc<br>301 tatttacatg acgtctcttc tgagtggcac aagcaataa taaaacttt taacaacgga<br>361 tctcttggt ctggcatcga tgaagaacgc agcgaatgc gataagtaat gtgaattgca<br>421 gaattcagtg aatcatcgaa tcttgaacg cacattgcgc tcgccagcat tctggcgagc<br>481 atgctgttc gagcgtcatt tcaacctca agcaccgctt ggtttgggg cccacggcc<br>541 gacgtgggcc cttaaaggta gtggcggacc ctccggagc ctctttgcg tagtaactaa<br>601 cgtctcgcat t<br>1 gtgaggcttt cggactggcc cagagagggtg ggcaactacc actccgggcc gaaagtta<br>61 ccaactcgg tcatttagag gaagtaaaag tcgtaacaag gtctccgttg gtgaaccagc<br>121 ggagggatca ttaactagtt accgctctac aaccctttgt gaacatacct aaccgttgc<br>181 tcggcgggca ggggaagcct ctctgggccc gacctccc gcgcggccc cgtcacgggg<br>241 gcggagcgcc cgccggagga aaccaactc tatttacag acgtctcttc tgagtggcac |
| MW855879 | V9g  | Forward | <i>Penicillium</i> spp. <sup>c</sup> | <i>A. scholaris</i>               | L  |                                                                                                                                                                                                                                                                                                                                                                                                                                                                                                                                                                                                                                                                                                                                                                                                                                                                                                                                                                                                                                                                                                                                                                                                                                                                                                                                                                                                                                                                                                                                                                                                                                                                                                                                                                                                                                                                                                                                                                                                                                                                                                                                                                                                                                                                                                                                                                                                                                                                                                                                                                                                                                                                                                                                                                                                                                                                                                                                                                                                                             |
| MW855880 | ITS4 | Reverse | <i>Penicillium</i> spp.              | <i>A. scholaris</i>               | L  |                                                                                                                                                                                                                                                                                                                                                                                                                                                                                                                                                                                                                                                                                                                                                                                                                                                                                                                                                                                                                                                                                                                                                                                                                                                                                                                                                                                                                                                                                                                                                                                                                                                                                                                                                                                                                                                                                                                                                                                                                                                                                                                                                                                                                                                                                                                                                                                                                                                                                                                                                                                                                                                                                                                                                                                                                                                                                                                                                                                                                             |
| MW855895 | V9g  | Forward | <i>C. godetiae</i> <sup>d</sup>      | <i>E. myrsinites</i> <sup>f</sup> | Sh |                                                                                                                                                                                                                                                                                                                                                                                                                                                                                                                                                                                                                                                                                                                                                                                                                                                                                                                                                                                                                                                                                                                                                                                                                                                                                                                                                                                                                                                                                                                                                                                                                                                                                                                                                                                                                                                                                                                                                                                                                                                                                                                                                                                                                                                                                                                                                                                                                                                                                                                                                                                                                                                                                                                                                                                                                                                                                                                                                                                                                             |
| MW855896 | ITS4 | Reverse | <i>C. godetiae</i>                   | <i>E. myrsinites</i>              | S  |                                                                                                                                                                                                                                                                                                                                                                                                                                                                                                                                                                                                                                                                                                                                                                                                                                                                                                                                                                                                                                                                                                                                                                                                                                                                                                                                                                                                                                                                                                                                                                                                                                                                                                                                                                                                                                                                                                                                                                                                                                                                                                                                                                                                                                                                                                                                                                                                                                                                                                                                                                                                                                                                                                                                                                                                                                                                                                                                                                                                                             |

301 aagcaaataa ttaaaacttt taacaacgga tctcttgggt ctggcatcga tgaagaacgc  
361 agcgaaatgc gataagtaat gtgaattgca gaattcagtg aatcatcgaa tctttgaacg  
421 cacattgcgc tcgccagcat tctggcgagc atgcctgttc gagcgtcatt tcaaccctca  
481 agcaccgctt ggttttgggg cccacggcc gacgtgggcc cttaaaggta gtggcggacc  
541 ctcccgagc ctctttgcg tagtaactaa cgtctgcac tgggatccgg agggactctt  
601 gccgttaaac ccccaaattt ttccaggtt acctcggatc aggtaggact acccgctgaa  
661 tt

---

<sup>a</sup> *Penicillium crustosum* (5/3/2); <sup>b</sup> *Penicillium* spp. (11(2)); <sup>c</sup> *Penicillium* spp. (4/3/2); <sup>d</sup> *Colletotrichum godetiae*; <sup>e</sup> *Alstonia scholaris*; <sup>f</sup> *Euphorbia myrsinites*; <sup>g</sup> Leaf; <sup>h</sup> Stem.
